# Supplementary material for: DNase-activatable fluorescence probes visualizing the degradation of exogenous DNA in living cells
Source: Royal Society of Chemistry journal article supplement (doi:10.1039/c2nr12005d), 2012-01-01
Supplement: c2nr12005d.pdf [file c2nr12005d.pdf]

## Supplementary Materials

# DNase-activatable fluorescence probes visualizing the degradation of exogenous DNA in living cells

Ping Gong<sup>‡</sup>, Bihua Shi<sup>‡</sup>, Pengfei Zhang, Dehong Hu, Mingbin Zheng, Cuifang Zheng, Duyang Gao and Lintao Cai\*

CAS Key Laboratory for Health Informatics, Shenzhen Key laboratory of Cancer Nanotechnology, Shenzhen Institutes of Advanced Technology, Chinese Academy of Sciences, Shenzhen, China.

**Corresponding author:** Shenzhen Institutes of Advanced Technology, Chinese Academy of Science, Shenzhen 518055, China.

**Address correspondence:** Tel: 86-755-86392210; Fax: 86-755-86392299; E-mail: lt.cai@siat.ac.cn (Lintao Cai).

Fig. S1A showed that the fluorescence signal of SYBR Green I decreased with the increase of DNase I concentration. Fig. S1B is the correlation between the fluorescence signal of SYBR Green I and the DNase I concentration, respectively.

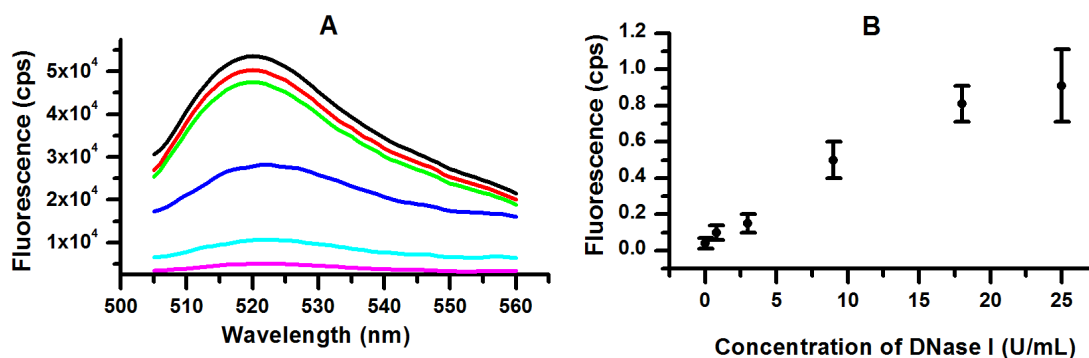

**Fig. S1.** (A) Fluorescence emission curves of DFProbes ( $\lambda_{\text{ex}} = 497 \text{ nm}$ ) catalyzed by various concentrations of DNase I (from top to bottom for 0.03 U/ mL, 0.8 U/ mL, 3.0 U/ mL, 9.0 U/ mL, 18 U/ mL and 25 U/ mL); (B) Plot of  $(F-F_0)/F_0$  ratio as a function of the concentrations of DNase I is obtained from (A).
